# Supplementary material for: Therapeutic effects of antibiotics loaded cellulose nanofiber and κ-carrageenan oligosaccharide composite hydrogels for periodontitis treatment
Source: PubMed Central journal article supplement (PMC7581766; doi:10.1038/s41598-020-74845-9), 2020-10-22
Supplement: 41598_2020_74845_MOESM1_ESM.pdf [file 41598_2020_74845_MOESM1_ESM.pdf]

# Therapeutic Effects of Antibiotics Loaded Cellulose Nanofiber and $\kappa$ -Carrageenan Oligosaccharide Composite Hydrogels for Periodontitis Treatment

Athira Johnson<sup>1</sup>, Fanbin Kong<sup>2</sup>, Song Miao<sup>3</sup>, Hong-Ting Victor Lin<sup>1</sup>, Sabu Thomas<sup>4</sup>, Yi-Cheng Huang<sup>1</sup>, Zwe-Ling Kong<sup>1\*</sup>

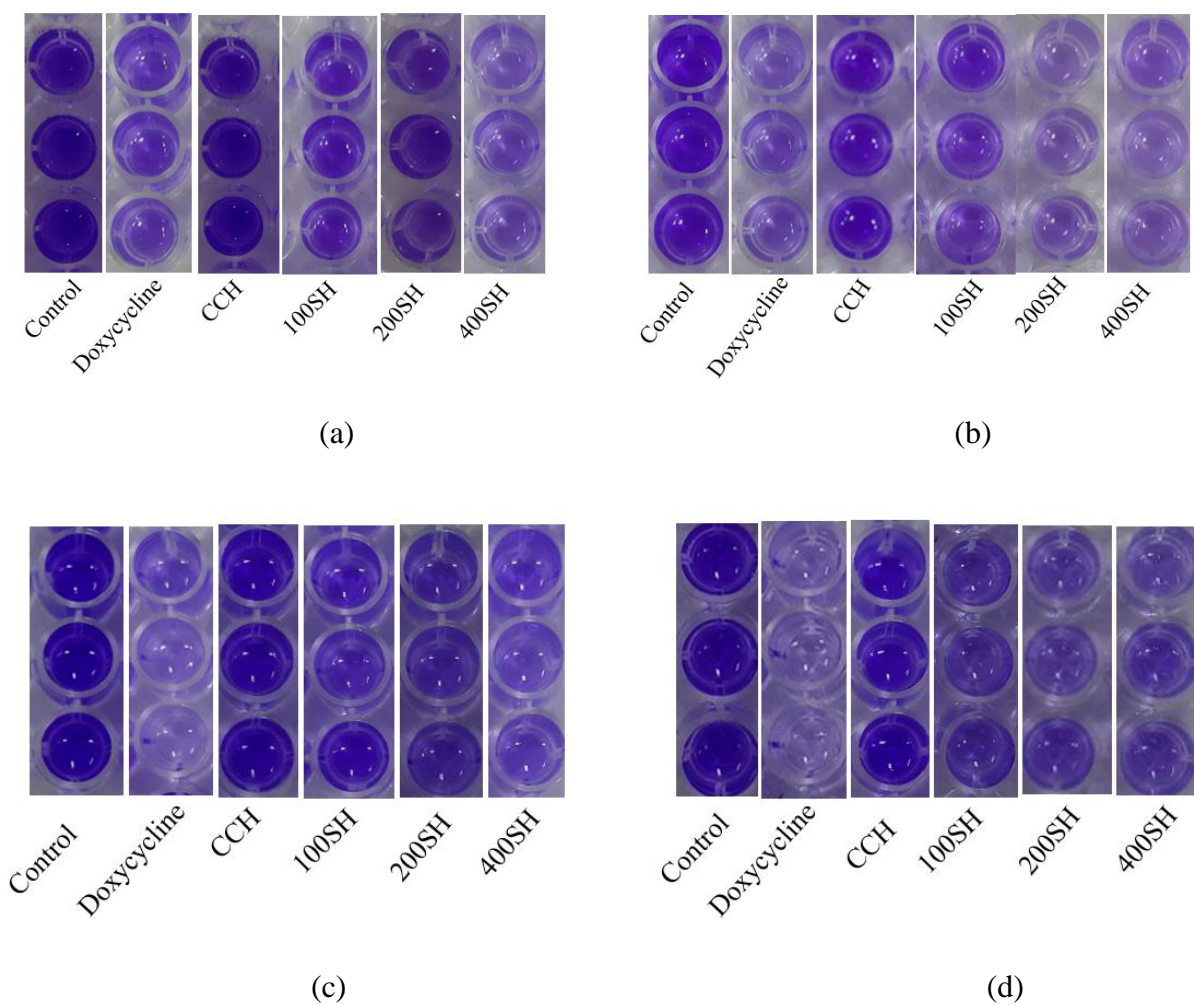

**Figure S1:** Visualization of the inhibition of biofilm (a) *Porphyromonas gingivalis*, (b) *Streptococcus mutans*, (c) *Fusobacterium nucleatum*, and (d) *Pseudomonas aeruginosa* by crystal violet assay. The samples were stained with 0.1% crystal violet and the absorbance was measured at 595 nm. CCH:  $\kappa$ -carrageenan oligosaccharides linked cellulose nanofibers

hydrogel, 100SH: 100 mg surfactin and Herbmedotcin loaded hydrogel, 200SH: 200 mg surfactin and Herbmedotcin loaded hydrogel, and 400SH: 400 mg surfactin and Herbmedotcin loaded hydrogel. Control: only bacteria.
